# Supplementary material
Source: publisher figshare collection journal article supplement (https://acs.figshare.com/ndownloader/files/5062654)
Supplement: Supplementary file 1 [file 5062654]

 
data_(Ph3SiOGaMe2)2

_publ_contact_author_name
   'Susannah L. Scott'
_publ_contact_author_email
   'sscott@engr.ucsb.edu'
loop_
   _publ_author_name
      'Ziyad A. Taha'
      'Eric W. Deguns'
      'Swarup Chattopadhyay'
      'Susannah L. Scott'
_journal_name_full
   'Submitted to Organometallics'
 
_audit_creation_method            SHELXL-97 
_chemical_name_systematic 
; 
 ? 
; 
_chemical_name_common             ? 
_chemical_melting_point           ? 
_chemical_formula_moiety          ? 
_chemical_formula_sum 
 'C20 H21 Ga O Si' 
_chemical_formula_weight          375.18 
 
loop_ 
 _atom_type_symbol 
 _atom_type_description 
 _atom_type_scat_dispersion_real 
 _atom_type_scat_dispersion_imag 
 _atom_type_scat_source 
 'C'  'C'   0.0033   0.0016 
 'International Tables Vol C Tables 4.2.6.8 and 6.1.1.4' 
 'H'  'H'   0.0000   0.0000 
 'International Tables Vol C Tables 4.2.6.8 and 6.1.1.4' 
 'O'  'O'   0.0106   0.0060 
 'International Tables Vol C Tables 4.2.6.8 and 6.1.1.4' 
 'Si'  'Si'   0.0817   0.0704 
 'International Tables Vol C Tables 4.2.6.8 and 6.1.1.4' 
 'Ga'  'Ga'   0.2307   1.6083 
 'International Tables Vol C Tables 4.2.6.8 and 6.1.1.4' 
 
_symmetry_cell_setting            triclinic 
_symmetry_space_group_name_H-M    P-1 
 
loop_ 
 _symmetry_equiv_pos_as_xyz 
 'x, y, z' 
 '-x, -y, -z' 
 
_cell_length_a                    8.7861(11) 
_cell_length_b                    9.5628(12) 
_cell_length_c                    12.8261(16) 
_cell_angle_alpha                 69.910(2) 
_cell_angle_beta                  74.453(2) 
_cell_angle_gamma                 64.222(2) 
_cell_volume                      902.3(2) 
_cell_formula_units_Z             2 
_cell_measurement_temperature     120(1) 
_cell_measurement_reflns_used     ? 
_cell_measurement_theta_min       ? 
_cell_measurement_theta_max       ? 
 
_exptl_crystal_description        plate 
_exptl_crystal_colour             colorless 
_exptl_crystal_size_max           0.2 
_exptl_crystal_size_mid           0.15 
_exptl_crystal_size_min           0.08 
_exptl_crystal_density_meas       n/a 
_exptl_crystal_density_diffrn     1.381 
_exptl_crystal_density_method     'not measured' 
_exptl_crystal_F_000              388 
_exptl_absorpt_coefficient_mu     1.593 
_exptl_absorpt_correction_type     'multi-scan' 
_exptl_absorpt_correction_T_min   ? 
_exptl_absorpt_correction_T_max   ? 
_exptl_absorpt_process_details    'SADABS' 
 
_exptl_special_details 
; 
 ? 
; 
 
_diffrn_ambient_temperature       120(1) 
_diffrn_radiation_wavelength      0.71073 
_diffrn_radiation_type            MoK\a 
_diffrn_radiation_source          'fine-focus sealed tube' 
_diffrn_radiation_monochromator   graphite 
_diffrn_measurement_device_type   'CCD area detector' 
_diffrn_measurement_method        'omega scan' 
_diffrn_detector_area_resol_mean  ? 
_diffrn_standards_number          ? 
_diffrn_standards_interval_count  ? 
_diffrn_standards_interval_time   ? 
_diffrn_standards_decay_%         ? 
_diffrn_reflns_number             6534 
_diffrn_reflns_av_R_equivalents   0.0315 
_diffrn_reflns_av_sigmaI/netI     0.0520 
_diffrn_reflns_limit_h_min        -11 
_diffrn_reflns_limit_h_max        11 
_diffrn_reflns_limit_k_min        -12 
_diffrn_reflns_limit_k_max        12 
_diffrn_reflns_limit_l_min        -11 
_diffrn_reflns_limit_l_max        16 
_diffrn_reflns_theta_min          1.71 
_diffrn_reflns_theta_max          28.56 
_reflns_number_total              3886 
_reflns_number_gt                 3204 
_reflns_threshold_expression      >2sigma(I) 
 
_computing_data_collection        ? 
_computing_cell_refinement        ? 
_computing_data_reduction         ? 
_computing_structure_solution     'SHELXS-97 (Sheldrick, 1990)' 
_computing_structure_refinement   'SHELXL-97 (Sheldrick, 1997)' 
_computing_molecular_graphics     ? 
_computing_publication_material   ? 
 
_refine_special_details 
; 
 Refinement of F^2^ against ALL reflections.  The weighted R-factor wR and 
 goodness of fit S are based on F^2^, conventional R-factors R are based 
 on F, with F set to zero for negative F^2^. The threshold expression of 
 F^2^ > 2sigma(F^2^) is used only for calculating R-factors(gt) etc. and is 
 not relevant to the choice of reflections for refinement.  R-factors based 
 on F^2^ are statistically about twice as large as those based on F, and R- 
 factors based on ALL data will be even larger. 
; 
 
_refine_ls_structure_factor_coef  Fsqd  
_refine_ls_matrix_type            full 
_refine_ls_weighting_scheme       calc  
_refine_ls_weighting_details 
 'calc w=1/[\s^2^(Fo^2^)+(0.0835P)^2^+0.0000P] where P=(Fo^2^+2Fc^2^)/3' 
_atom_sites_solution_primary      direct 
_atom_sites_solution_secondary    difmap 
_atom_sites_solution_hydrogens    geom 
_refine_ls_hydrogen_treatment     mixed 
_refine_ls_extinction_method      none 
_refine_ls_extinction_coef        ? 
_refine_ls_number_reflns          3886 
_refine_ls_number_parameters      292 
_refine_ls_number_restraints      0 
_refine_ls_R_factor_all           0.0540 
_refine_ls_R_factor_gt            0.0402 
_refine_ls_wR_factor_ref          0.1259 
_refine_ls_wR_factor_gt           0.1098 
_refine_ls_goodness_of_fit_ref    1.058 
_refine_ls_restrained_S_all       1.058 
_refine_ls_shift/su_max           0.001 
_refine_ls_shift/su_mean          0.000 
 
loop_ 
 _atom_site_label 
 _atom_site_type_symbol 
 _atom_site_fract_x 
 _atom_site_fract_y 
 _atom_site_fract_z 
 _atom_site_U_iso_or_equiv 
 _atom_site_adp_type 
 _atom_site_occupancy 
 _atom_site_symmetry_multiplicity 
 _atom_site_calc_flag 
 _atom_site_refinement_flags 
 _atom_site_disorder_assembly 
 _atom_site_disorder_group 
C1 C 0.2097(5) 1.3077(4) 0.4384(3) 0.0294(8) Uani 1 1 d . . . 
C2 C 0.2529(5) 0.9263(5) 0.4395(3) 0.0285(8) Uani 1 1 d . . . 
C3 C 0.1296(4) 1.0675(3) 0.7675(2) 0.0159(6) Uani 1 1 d . . . 
C4 C 0.0031(4) 1.1487(4) 0.6974(2) 0.0198(6) Uani 1 1 d . . . 
C5 C -0.1527(5) 1.2640(4) 0.7260(3) 0.0256(7) Uani 1 1 d . . . 
C6 C -0.1869(5) 1.3013(4) 0.8269(3) 0.0277(7) Uani 1 1 d . . . 
C7 C -0.0651(5) 1.2224(4) 0.8986(3) 0.0276(7) Uani 1 1 d . . . 
C8 C 0.0910(4) 1.1071(4) 0.8699(2) 0.0206(6) Uani 1 1 d . . . 
C9 C 0.4856(4) 0.8441(3) 0.8300(2) 0.0167(6) Uani 1 1 d . . . 
C10 C 0.5512(4) 0.9541(4) 0.8307(2) 0.0211(7) Uani 1 1 d . . . 
C11 C 0.6606(5) 0.9150(4) 0.9045(2) 0.0233(7) Uani 1 1 d . . . 
C12 C 0.7075(4) 0.7641(4) 0.9809(2) 0.0230(7) Uani 1 1 d . . . 
C13 C 0.6439(5) 0.6537(4) 0.9829(2) 0.0239(7) Uani 1 1 d . . . 
C14 C 0.5331(4) 0.6938(4) 0.9084(2) 0.0203(6) Uani 1 1 d . . . 
C15 C 0.2797(4) 0.7336(3) 0.7332(2) 0.0167(6) Uani 1 1 d . . . 
C16 C 0.1186(4) 0.7282(4) 0.7784(2) 0.0214(6) Uani 1 1 d . . . 
C17 C 0.0740(5) 0.6061(4) 0.7749(3) 0.0258(7) Uani 1 1 d . . . 
C18 C 0.1924(5) 0.4869(4) 0.7253(3) 0.0285(8) Uani 1 1 d . . . 
C19 C 0.3529(5) 0.4876(4) 0.6819(3) 0.0324(8) Uani 1 1 d . . . 
C20 C 0.3980(5) 0.6080(4) 0.6853(3) 0.0280(7) Uani 1 1 d . . . 
Ga Ga 0.33117(4) 1.07586(4) 0.45907(2) 0.01718(13) Uani 1 1 d . . . 
H4 H 0.024(4) 1.114(4) 0.633(3) 0.014(8) Uiso 1 1 d . . . 
H5 H -0.220(5) 1.310(5) 0.677(3) 0.029(10) Uiso 1 1 d . . . 
H6 H -0.284(5) 1.382(5) 0.841(3) 0.029(10) Uiso 1 1 d . . . 
H7 H -0.085(5) 1.253(4) 0.961(3) 0.026(9) Uiso 1 1 d . . . 
H8 H 0.177(4) 1.055(4) 0.918(2) 0.013(8) Uiso 1 1 d . . . 
H10 H 0.509(5) 1.060(4) 0.783(3) 0.019(8) Uiso 1 1 d . . . 
H11 H 0.701(6) 0.995(5) 0.911(3) 0.043(12) Uiso 1 1 d . . . 
H12 H 0.791(5) 0.727(4) 1.032(3) 0.030(10) Uiso 1 1 d . . . 
H13 H 0.668(5) 0.552(5) 1.040(3) 0.030(10) Uiso 1 1 d . . . 
H14 H 0.488(5) 0.618(4) 0.910(3) 0.022(9) Uiso 1 1 d . . . 
H16 H 0.043(5) 0.807(4) 0.809(3) 0.026(9) Uiso 1 1 d . . . 
H17 H -0.044(5) 0.607(4) 0.809(3) 0.021(9) Uiso 1 1 d . . . 
H18 H 0.162(6) 0.415(5) 0.717(4) 0.049(13) Uiso 1 1 d . . . 
H19 H 0.418(6) 0.424(5) 0.648(3) 0.040(12) Uiso 1 1 d . . . 
H20 H 0.503(5) 0.614(4) 0.652(3) 0.028(10) Uiso 1 1 d . . . 
H1A H 0.083(6) 1.338(5) 0.465(3) 0.036(10) Uiso 1 1 d . . . 
H2A H 0.343(7) 0.831(6) 0.439(4) 0.048(13) Uiso 1 1 d . . . 
H1B H 0.242(7) 1.349(6) 0.476(4) 0.059(16) Uiso 1 1 d . . . 
H2B H 0.208(6) 0.964(5) 0.376(4) 0.044(12) Uiso 1 1 d . . . 
H1C H 0.245(5) 1.356(5) 0.366(3) 0.032(10) Uiso 1 1 d . . . 
H2C H 0.146(7) 0.911(6) 0.504(4) 0.071(15) Uiso 1 1 d . . . 
O O 0.4253(3) 0.9723(2) 0.60296(15) 0.0166(4) Uani 1 1 d . . . 
Si Si 0.33389(11) 0.90459(9) 0.72990(6) 0.01428(19) Uani 1 1 d . . . 
 
loop_ 
 _atom_site_aniso_label 
 _atom_site_aniso_U_11 
 _atom_site_aniso_U_22 
 _atom_site_aniso_U_33 
 _atom_site_aniso_U_23 
 _atom_site_aniso_U_13 
 _atom_site_aniso_U_12 
C1 0.023(2) 0.0213(16) 0.0295(17) 0.0061(13) -0.0039(14) -0.0051(14) 
C2 0.030(2) 0.042(2) 0.0254(16) -0.0081(15) -0.0086(15) -0.0229(18) 
C3 0.0175(17) 0.0133(13) 0.0171(12) -0.0003(10) -0.0037(11) -0.0081(11) 
C4 0.0191(17) 0.0216(15) 0.0199(13) -0.0025(11) -0.0073(11) -0.0084(12) 
C5 0.024(2) 0.0226(15) 0.0306(16) -0.0009(13) -0.0127(14) -0.0087(14) 
C6 0.022(2) 0.0219(16) 0.0357(17) -0.0099(13) -0.0008(14) -0.0060(14) 
C7 0.033(2) 0.0281(17) 0.0226(15) -0.0090(13) -0.0021(14) -0.0118(15) 
C8 0.0220(18) 0.0232(15) 0.0177(13) -0.0014(11) -0.0071(12) -0.0101(13) 
C9 0.0186(16) 0.0186(14) 0.0136(11) -0.0008(10) -0.0047(11) -0.0088(12) 
C10 0.032(2) 0.0189(14) 0.0159(12) 0.0006(11) -0.0072(12) -0.0141(13) 
C11 0.031(2) 0.0243(15) 0.0209(14) -0.0034(12) -0.0062(12) -0.0169(14) 
C12 0.0221(19) 0.0276(16) 0.0212(14) -0.0017(12) -0.0119(12) -0.0095(14) 
C13 0.028(2) 0.0213(15) 0.0191(13) 0.0067(12) -0.0132(12) -0.0096(13) 
C14 0.0263(19) 0.0194(14) 0.0182(13) 0.0013(11) -0.0082(12) -0.0132(13) 
C15 0.0197(17) 0.0163(13) 0.0156(12) 0.0029(10) -0.0094(11) -0.0096(12) 
C16 0.0225(18) 0.0234(15) 0.0221(14) -0.0040(12) -0.0058(12) -0.0119(13) 
C17 0.026(2) 0.0313(17) 0.0270(15) -0.0041(13) -0.0046(13) -0.0191(15) 
C18 0.037(2) 0.0232(16) 0.0357(17) -0.0023(13) -0.0122(15) -0.0206(15) 
C19 0.029(2) 0.0228(17) 0.049(2) -0.0150(16) -0.0061(16) -0.0093(15) 
C20 0.021(2) 0.0247(16) 0.0414(18) -0.0111(14) -0.0008(15) -0.0113(14) 
Ga 0.0174(2) 0.0205(2) 0.01394(17) 0.00160(12) -0.00808(12) -0.00872(14) 
O 0.0201(12) 0.0188(10) 0.0122(8) 0.0023(7) -0.0078(7) -0.0099(8) 
Si 0.0172(5) 0.0144(4) 0.0124(3) 0.0012(3) -0.0064(3) -0.0081(3) 
 
_geom_special_details 
; 
 All esds (except the esd in the dihedral angle between two l.s. planes) 
 are estimated using the full covariance matrix.  The cell esds are taken 
 into account individually in the estimation of esds in distances, angles 
 and torsion angles; correlations between esds in cell parameters are only 
 used when they are defined by crystal symmetry.  An approximate (isotropic) 
 treatment of cell esds is used for estimating esds involving l.s. planes. 
; 
 
loop_ 
 _geom_bond_atom_site_label_1 
 _geom_bond_atom_site_label_2 
 _geom_bond_distance 
 _geom_bond_site_symmetry_2 
 _geom_bond_publ_flag 
C1 Ga 1.953(4) . ? 
C1 H1A 1.01(5) . ? 
C1 H1B 0.88(5) . ? 
C1 H1C 0.92(4) . ? 
C2 Ga 1.943(3) . ? 
C2 H2A 0.91(5) . ? 
C2 H2B 0.89(4) . ? 
C2 H2C 1.10(5) . ? 
C3 C4 1.398(4) . ? 
C3 C8 1.404(4) . ? 
C3 Si 1.871(3) . ? 
C4 C5 1.385(5) . ? 
C4 H4 0.94(3) . ? 
C5 C6 1.382(5) . ? 
C5 H5 0.85(4) . ? 
C6 C7 1.382(5) . ? 
C6 H6 0.89(4) . ? 
C7 C8 1.388(5) . ? 
C7 H7 0.90(4) . ? 
C8 H8 0.96(3) . ? 
C9 C14 1.400(4) . ? 
C9 C10 1.406(4) . ? 
C9 Si 1.869(3) . ? 
C10 C11 1.376(4) . ? 
C10 H10 0.95(3) . ? 
C11 C12 1.393(4) . ? 
C11 H11 1.00(4) . ? 
C12 C13 1.384(5) . ? 
C12 H12 0.98(4) . ? 
C13 C14 1.389(4) . ? 
C13 H13 0.97(4) . ? 
C14 H14 0.96(4) . ? 
C15 C16 1.395(5) . ? 
C15 C20 1.407(4) . ? 
C15 Si 1.876(3) . ? 
C16 C17 1.401(4) . ? 
C16 H16 0.89(4) . ? 
C17 C18 1.378(5) . ? 
C17 H17 1.01(4) . ? 
C18 C19 1.373(6) . ? 
C18 H18 0.88(5) . ? 
C19 C20 1.387(5) . ? 
C19 H19 0.80(4) . ? 
C20 H20 0.93(4) . ? 
Ga O 1.976(2) 2_676 ? 
Ga O 1.9800(19) . ? 
Ga Ga 2.9813(7) 2_676 ? 
O Si 1.656(2) . ? 
O Ga 1.976(2) 2_676 ? 
 
loop_ 
 _geom_angle_atom_site_label_1 
 _geom_angle_atom_site_label_2 
 _geom_angle_atom_site_label_3 
 _geom_angle 
 _geom_angle_site_symmetry_1 
 _geom_angle_site_symmetry_3 
 _geom_angle_publ_flag 
Ga C1 H1A 112(2) . . ? 
Ga C1 H1B 114(3) . . ? 
H1A C1 H1B 104(4) . . ? 
Ga C1 H1C 107(2) . . ? 
H1A C1 H1C 118(3) . . ? 
H1B C1 H1C 101(4) . . ? 
Ga C2 H2A 109(3) . . ? 
Ga C2 H2B 112(3) . . ? 
H2A C2 H2B 109(4) . . ? 
Ga C2 H2C 112(3) . . ? 
H2A C2 H2C 112(4) . . ? 
H2B C2 H2C 103(4) . . ? 
C4 C3 C8 116.7(3) . . ? 
C4 C3 Si 121.0(2) . . ? 
C8 C3 Si 122.1(2) . . ? 
C5 C4 C3 122.2(3) . . ? 
C5 C4 H4 121(2) . . ? 
C3 C4 H4 117(2) . . ? 
C6 C5 C4 119.8(3) . . ? 
C6 C5 H5 124(3) . . ? 
C4 C5 H5 116(3) . . ? 
C7 C6 C5 119.5(3) . . ? 
C7 C6 H6 122(3) . . ? 
C5 C6 H6 118(2) . . ? 
C6 C7 C8 120.7(3) . . ? 
C6 C7 H7 119(2) . . ? 
C8 C7 H7 120(2) . . ? 
C7 C8 C3 121.1(3) . . ? 
C7 C8 H8 120.7(19) . . ? 
C3 C8 H8 118.2(19) . . ? 
C14 C9 C10 117.7(3) . . ? 
C14 C9 Si 122.6(2) . . ? 
C10 C9 Si 119.6(2) . . ? 
C11 C10 C9 121.3(3) . . ? 
C11 C10 H10 121(2) . . ? 
C9 C10 H10 117(2) . . ? 
C10 C11 C12 119.9(3) . . ? 
C10 C11 H11 122(2) . . ? 
C12 C11 H11 117(2) . . ? 
C13 C12 C11 120.2(3) . . ? 
C13 C12 H12 117(2) . . ? 
C11 C12 H12 123(2) . . ? 
C12 C13 C14 119.8(3) . . ? 
C12 C13 H13 121(2) . . ? 
C14 C13 H13 119(2) . . ? 
C13 C14 C9 121.2(3) . . ? 
C13 C14 H14 120(2) . . ? 
C9 C14 H14 119(2) . . ? 
C16 C15 C20 116.7(3) . . ? 
C16 C15 Si 121.9(2) . . ? 
C20 C15 Si 121.3(2) . . ? 
C15 C16 C17 122.2(3) . . ? 
C15 C16 H16 118(2) . . ? 
C17 C16 H16 120(3) . . ? 
C18 C17 C16 119.3(3) . . ? 
C18 C17 H17 121.0(19) . . ? 
C16 C17 H17 119.7(19) . . ? 
C19 C18 C17 119.7(3) . . ? 
C19 C18 H18 120(3) . . ? 
C17 C18 H18 120(3) . . ? 
C18 C19 C20 121.2(3) . . ? 
C18 C19 H19 120(3) . . ? 
C20 C19 H19 119(3) . . ? 
C19 C20 C15 120.8(3) . . ? 
C19 C20 H20 122(2) . . ? 
C15 C20 H20 117(2) . . ? 
C2 Ga C1 127.50(18) . . ? 
C2 Ga O 110.95(14) . 2_676 ? 
C1 Ga O 109.76(13) . 2_676 ? 
C2 Ga O 105.85(12) . . ? 
C1 Ga O 111.23(13) . . ? 
O Ga O 82.21(8) 2_676 . ? 
C2 Ga Ga 114.73(13) . 2_676 ? 
C1 Ga Ga 117.69(13) . 2_676 ? 
O Ga Ga 41.15(5) 2_676 2_676 ? 
O Ga Ga 41.06(6) . 2_676 ? 
Si O Ga 130.66(12) . 2_676 ? 
Si O Ga 129.70(13) . . ? 
Ga O Ga 97.79(8) 2_676 . ? 
O Si C9 107.24(12) . . ? 
O Si C3 109.93(11) . . ? 
C9 Si C3 109.60(13) . . ? 
O Si C15 110.23(12) . . ? 
C9 Si C15 112.44(12) . . ? 
C3 Si C15 107.41(14) . . ? 
 
loop_ 
 _geom_torsion_atom_site_label_1 
 _geom_torsion_atom_site_label_2 
 _geom_torsion_atom_site_label_3 
 _geom_torsion_atom_site_label_4 
 _geom_torsion 
 _geom_torsion_site_symmetry_1 
 _geom_torsion_site_symmetry_2 
 _geom_torsion_site_symmetry_3 
 _geom_torsion_site_symmetry_4 
 _geom_torsion_publ_flag 
C8 C3 C4 C5 0.6(4) . . . . ? 
Si C3 C4 C5 176.6(2) . . . . ? 
C3 C4 C5 C6 -0.2(5) . . . . ? 
C4 C5 C6 C7 -0.3(5) . . . . ? 
C5 C6 C7 C8 0.4(5) . . . . ? 
C6 C7 C8 C3 0.1(5) . . . . ? 
C4 C3 C8 C7 -0.5(4) . . . . ? 
Si C3 C8 C7 -176.5(2) . . . . ? 
C14 C9 C10 C11 1.1(5) . . . . ? 
Si C9 C10 C11 178.8(3) . . . . ? 
C9 C10 C11 C12 -0.4(5) . . . . ? 
C10 C11 C12 C13 -0.2(5) . . . . ? 
C11 C12 C13 C14 0.0(5) . . . . ? 
C12 C13 C14 C9 0.7(5) . . . . ? 
C10 C9 C14 C13 -1.2(5) . . . . ? 
Si C9 C14 C13 -178.9(3) . . . . ? 
C20 C15 C16 C17 -1.1(4) . . . . ? 
Si C15 C16 C17 176.0(2) . . . . ? 
C15 C16 C17 C18 -0.1(5) . . . . ? 
C16 C17 C18 C19 1.2(5) . . . . ? 
C17 C18 C19 C20 -1.1(6) . . . . ? 
C18 C19 C20 C15 -0.2(6) . . . . ? 
C16 C15 C20 C19 1.3(5) . . . . ? 
Si C15 C20 C19 -175.9(3) . . . . ? 
C2 Ga O Si -55.9(2) . . . . ? 
C1 Ga O Si 86.19(19) . . . . ? 
O Ga O Si -165.6(2) 2_676 . . . ? 
Ga Ga O Si -165.6(2) 2_676 . . . ? 
C2 Ga O Ga 109.65(14) . . . 2_676 ? 
C1 Ga O Ga -108.24(14) . . . 2_676 ? 
O Ga O Ga 0.0 2_676 . . 2_676 ? 
Ga O Si C9 25.67(19) 2_676 . . . ? 
Ga O Si C9 -173.32(14) . . . . ? 
Ga O Si C3 144.75(15) 2_676 . . . ? 
Ga O Si C3 -54.24(18) . . . . ? 
Ga O Si C15 -97.04(17) 2_676 . . . ? 
Ga O Si C15 63.97(18) . . . . ? 
C14 C9 Si O -129.4(2) . . . . ? 
C10 C9 Si O 53.0(3) . . . . ? 
C14 C9 Si C3 111.3(3) . . . . ? 
C10 C9 Si C3 -66.3(3) . . . . ? 
C14 C9 Si C15 -8.1(3) . . . . ? 
C10 C9 Si C15 174.3(2) . . . . ? 
C4 C3 Si O 54.0(3) . . . . ? 
C8 C3 Si O -130.2(2) . . . . ? 
C4 C3 Si C9 171.6(2) . . . . ? 
C8 C3 Si C9 -12.6(3) . . . . ? 
C4 C3 Si C15 -65.9(3) . . . . ? 
C8 C3 Si C15 109.8(2) . . . . ? 
C16 C15 Si O -131.0(2) . . . . ? 
C20 C15 Si O 46.0(3) . . . . ? 
C16 C15 Si C9 109.4(2) . . . . ? 
C20 C15 Si C9 -73.6(3) . . . . ? 
C16 C15 Si C3 -11.3(3) . . . . ? 
C20 C15 Si C3 165.7(3) . . . . ? 
 
_diffrn_measured_fraction_theta_max    0.845 
_diffrn_reflns_theta_full              28.56 
_diffrn_measured_fraction_theta_full   0.845 
_refine_diff_density_max    1.302 
_refine_diff_density_min   -0.815 
_refine_diff_density_rms    0.136 
